# Supplementary material for: Absence of strong strain effects in behavioral analyses of Shank3-deficient mice
Source: PubMed Central journal article supplement (PMC4036474; doi:10.1242/dmm.013821), 2014-03-20
Supplement: supp_7.6.667_DMM013821.pdf [file supp_7.6.667_DMM013821.pdf]

| Strain                                    | 129           |               |               |         |         |         |        |               | C57           |               |        |        |       |       | FVB           |                |               |       |        |       |        |
|-------------------------------------------|---------------|---------------|---------------|---------|---------|---------|--------|---------------|---------------|---------------|--------|--------|-------|-------|---------------|----------------|---------------|-------|--------|-------|--------|
|                                           | WT            | Het           | KO            | ANCOVA  |         |         |        | WT            | Het           | KO            | ANCOVA |        |       | WT    | Het           | KO             | ANCOVA        |       |        |       |        |
|                                           |               |               |               | p       | WT/Het  | WT/KO   | Het/KO |               |               |               | p      | WT/Het | WT/KO |       |               |                | Het/KO        | p     | WT/Het | WT/KO | Het/KO |
| n                                         | 19            | 23            | 12            |         |         |         |        | 17            | 20            | 17            |        |        |       | 18    | 19            | 17             |               |       |        |       |        |
| Blood analysis, chemical                  |               |               |               |         |         |         |        |               |               |               |        |        |       |       |               |                |               |       |        |       |        |
| Alkaline phosphatase                      | 146.67±3.84   | 220.00±42.85  | 155.00±3.21   | 0.154   | -       | -       | -      | 127.33±1.20   | 102.00±9.54   | 122.33±4.70   | 0.059  | 0.062  | 1.000 | 0.127 | 119.67±19.41  | 132.33±5.84    | 165.00±3.00   | 0.173 | -      | -     | -      |
| Alanine aminotransferase                  | 78.33±24.18   | 82.33±24.26   | 94.00±31.24   | 0.913   | -       | -       | -      | 60.00±12.06   | 48.67±4.48    | 47.67±15.67   | 0.778  | -      | -     | -     | 44.43±6.64    | 24.67±1.33     | 37.33±9.21    | 0.183 | -      | -     | -      |
| Aspartate aminotransferase                | 116.00±25.03  | 134.00±37.72  | 114.67±21.49  | 0.854   | -       | -       | -      | 120.00±48.69  | 134.00±30.86  | 76.33±9.02    | 0.493  | -      | -     | -     | 57.67±27.39   | 87.67±24.46    | 68.75±5.81    | 0.589 | -      | -     | -      |
| Creatine kinase                           | 125.67±27.70  | 320.00±66.15  | 207.67±44.85  | 0.074   | 0.064   | 0.491   | 0.295  | 258.67±135.18 | 440.00±173.00 | 134.67±23.90  | 0.307  | -      | -     | -     | 267.67±157.49 | 235.00±1373.75 | 100.00±19.00  | 0.726 | -      | -     | -      |
| albumin                                   | 3.00±0.20     | 3.90±0.90     | 3.15±0.15     | 0.560   | -       | -       | -      | 3.17±0.12     | 3.00±0.00     | 3.23±0.07     | 0.315  | -      | -     | -     | 3.23±0.05     | 3.30±0.15      | 3.33±0.05     | 0.660 | -      | -     | -      |
| total protein                             | 5.10±0.21     | 5.93±0.66     | 5.17±0.17     | 0.344   | -       | -       | -      | 5.93±0.24     | 5.53±0.29     | 5.87±0.09     | 0.449  | -      | -     | -     | 5.93±0.09     | 5.90±0.15      | 5.87±0.09     | 0.919 | -      | -     | -      |
| globulin                                  | 2.10±0.06     | 1.90±0.20     | 2.10±0.006    | 0.471   | -       | -       | -      | 2.73±0.18     | 2.60±0.21     | 2.63±0.03     | 0.831  | -      | -     | -     | 2.73±0.09     | 2.75±0.05      | 2.50±0.00     | 0.148 | -      | -     | -      |
| Blood urea nitrogen                       | 22.67±2.03    | 28.33±6.44    | 20.00±1.53    | 0.382   | -       | -       | -      | 26.00±2.08    | 23.33±2.40    | 23.67±1.67    | 0.634  | -      | -     | -     | 21.67±0.88    | 21.33±0.33     | 23.67±0.88    | 0.134 | -      | -     | -      |
| Cholesterol                               | 92.50±6.50    | 110.67±26.59  | 83.00±1.53    | 0.549   | -       | -       | -      | 193.00±9.00   | 180.00±13.58  | 187.67±4.48   | 0.699  | -      | -     | -     | 126.50±0.50   | 123.00±5.00    | 121.50±2.50   | 0.592 | -      | -     | -      |
| Glucose                                   | 322.33±19.46  | 496.00±186.28 | 270.33±23.24  | 0.371   | -       | -       | -      | 371.67±23.40  | 408.67±60.99  | 354.00±24.58  | 0.641  | -      | -     | -     | 232.00±34.59  | 258.50±17.68   | 261.75±6.46   | 0.566 | -      | -     | -      |
| Calcium                                   | 11.00±0.15    | 14.90±4.06    | 10.57±0.17    | 0.411   | -       | -       | -      | 9.03±0.44     | 8.77±0.12     | 8.77±0.50     | 0.860  | -      | -     | -     | 10.13±0.97    | 9.97±0.20      | 10.80±0.20    | 0.595 | -      | -     | -      |
| Phosphorus                                | 12.30±0.89    | 19.23±6.02    | 13.50±1.31    | 0.403   | -       | -       | -      | 12.10±1.30    | 14.13±0.19    | 13.13±0.93    | 0.366  | -      | -     | -     | 11.87±0.89    | 10.73±0.55     | 10.95±0.60    | 0.520 | -      | -     | -      |
| Total Carbon dioxide                      | 17.00±0.58    | 18.67±4.70    | 18.00±0.58    | 0.913   | -       | -       | -      | 17.33±1.76    | 17.33±2.03    | 19.33±0.33    | 0.606  | -      | -     | -     | 20.50±2.50    | 18.67±2.33     | 22.50±2.50    | 0.584 | -      | -     | -      |
| Albumin Globulin ratio                    | 1.43±0.12     | 2.13±0.84     | 1.43±0.07     | 0.540   | -       | -       | -      | 1.13±0.03     | 1.13±0.07     | 1.23±0.03     | 0.296  | -      | -     | -     | 1.17±0.07     | 1.13±0.09      | 1.37±0.07     | 0.134 | -      | -     | -      |
| Hemolysis index                           | 1.00±0.00     | 1.00±0.58     | 0.33±0.33     | 0.422   | -       | -       | -      | 0.67±0.33     | 0.67±0.33     | 0.33±0.33     | 0.729  | -      | -     | -     | 1.33±0.67     | 0.0±0.00       | 3.67±3.18     | 0.429 | -      | -     | -      |
| Lipemia index                             | 0.00±0.00     | 0.00±0.00     | 0.00±0.00     | -       | -       | -       | -      | 0.00±0.00     | 0.00±0.00     | 0.00±0.00     | -      | -      | -     | -     | 0.00±0.00     | 0.00±0.00      | 0.00±0.00     | -     | -      | -     | -      |
| Blood analysis, complete blood count      |               |               |               |         |         |         |        |               |               |               |        |        |       |       |               |                |               |       |        |       |        |
| White blood cells                         | 6.50±1.50     | 6.07±2.45     | 6.83±1.79     | 0.964   | -       | -       | -      | 5.37±2.19     | 6.70±0.59     | 8.13±1.59     | 0.512  | -      | -     | -     | 6.10±0.35     | 8.23±1.28      | 7.97±1.45     | 0.407 | -      | -     | -      |
| Red blood cells                           | 8.98±0.12     | 8.96±0.20     | 9.07±0.14     | 0.893   | -       | -       | -      | 9.48±0.29     | 9.51±0.16     | 9.24±0.28     | 0.713  | -      | -     | -     | 9.85±0.20     | 9.55±0.12      | 9.30±0.15     | 0.130 | -      | -     | -      |
| hemoglobin                                | 13.95±0.25    | 13.70±0.31    | 13.77±0.32    | 0.865   | -       | -       | -      | 14.23±0.41    | 13.73±0.19    | 13.67±0.55    | 0.591  | -      | -     | -     | 15.97±0.33    | 15.67±0.20     | 14.00±1.30    | 0.239 | -      | -     | -      |
| hematocrit                                | 59.35±0.85    | 58.33±1.93    | 59.30±0.64    | 0.846   | -       | -       | -      | 55.13±1.50    | 54.70±0.53    | 54.53±1.57    | 0.945  | -      | -     | -     | 63.43±1.40    | 62.03±0.69     | 60.40±0.26    | 0.141 | -      | -     | -      |
| Mean corpuscular volume                   | 66.00±0.00    | 65.00±1.00    | 65.33±0.33    | 0.659   | -       | -       | -      | 58.33±2.33    | 57.67±0.67    | 59.00±0.00    | 0.804  | -      | -     | -     | 64.33±0.33    | 65.00±0.00     | 65.00±1.00    | 0.687 | -      | -     | -      |
| mean corpuscular hemoglobin               | 15.55±0.05    | 15.27±0.03    | 15.20±0.10    | 0.055   | 0.104   | 0.053   | 0.784  | 15.03±0.22    | 14.47±0.12    | 14.80±0.15    | 0.135  | -      | -     | -     | 16.20±0.06    | 16.43±0.03     | 15.10±1.60    | 0.584 | -      | -     | -      |
| mean corpuscular hemoglobin concentration | 23.55±0.05    | 23.47±0.37    | 23.20±0.26    | 0.718   | -       | -       | -      | 25.87±1.27    | 25.13±0.20    | 25.03±0.32    | 0.715  | -      | -     | -     | 25.20±0.10    | 25.30±0.06     | 23.23±2.22    | 0.482 | -      | -     | -      |
| Nucleated red blood cells for 100WBC      | 0.00±0.00     | 0.00±0.00     | 0.00±0.00     | -       | -       | -       | -      | 0.00±0.00     | 0.00±0.00     | 0.00±0.00     | -      | -      | -     | -     | 0.00±0.00     | 0.00±0.00      | 0.00±0.00     | -     | -      | -     | -      |
| Neutrophil                                | 19.20±0.50    | 21.67±8.35    | 28.80±10.59   | 0.753   | -       | -       | -      | 19.23±0.00    | 9.43±1.98     | 10.33±0.18    | 0.381  | -      | -     | -     | 13.80±2.00    | 10.57±0.60     | 12.00±1.06    | 0.309 | -      | -     | -      |
| Lymphocyte                                | 73.45±0.25    | 71.53±9.02    | 66.97±10.93   | 0.890   | -       | -       | -      | 82.50±3.07    | 87.23±2.03    | 85.13±0.88    | 0.370  | -      | -     | -     | 78.87±4.95    | 83.00±1.31     | 82.20±0.67    | 0.609 | -      | -     | -      |
| Monocyte                                  | 2.05±0.45     | 2.80±0.62     | 1.67±0.63     | 0.444   | -       | -       | -      | 3.50±2.25     | 0.77±0.15     | 1.03±0.03     | 0.332  | -      | -     | -     | 2.03±0.32     | 1.20±0.10      | 1.77±0.63     | 0.403 | -      | -     | -      |
| Eosinophil                                | 3.50±0.30     | 2.60±2.03     | 1.20±0.10     | 0.548   | -       | -       | -      | 1.40±1.11     | 0.63±0.15     | 1.53±0.58     | 0.662  | -      | -     | -     | 4.40±3.11     | 3.73±1.05      | 2.90±0.59     | 0.862 | -      | -     | -      |
| Basophil                                  | 0.30±0.00     | 0.43±0.30     | 0.27±0.03     | 0.815   | -       | -       | -      | 0.13±0.009    | 0.33±0.03     | 0.20±0.06     | 0.158  | -      | -     | -     | 0.20±0.12     | 0.30±0.00      | 0.17±0.09     | 0.540 | -      | -     | -      |
| Platelet estimate                         | 0.50±0.50     | -0.33±0.33    | 0.67±0.33     | 0.199   | -       | -       | -      | 0.33±0.33     | 0.67±0.33     | 0.67±0.33     | 0.729  | -      | -     | -     | 0.00±0.00     | 0.00±0.00      | 0.00±0.00     | -     | -      | -     | -      |
| Asolute neutrophil                        | 1240.5±255.5  | 1352.0±943.3  | 2262.6±1304.4 | 0.770   | -       | -       | -      | 661.0±190.9   | 613.0±106.0   | 834.6±149.5   | 0.587  | -      | -     | -     | 831.7±99.4    | 884.3±174.2    | 969.3±209.4   | 0.846 | -      | -     | -      |
| Absolute lymphocyte                       | 4778.0±1118.0 | 4407.0±1878.4 | 4275.3±595.8  | 0.970   | -       | -       | -      | 4490.3±1874.8 | 5863.3±635.5  | 6897.6±1279.3 | 0.497  | -      | -     | -     | 4814.0±439.2  | 6804.67±979.19 | 6538.3±1176.2 | 0.321 | -      | -     | -      |
| Absolute Monocyte                         | 140.00±60.00  | 189.33±87.57  | 123.33±63.28  | 0.807   | -       | -       | -      | 89.33±10.35   | 49.67±5.61    | 83.00±14.47   | 0.082  | 0.089  | 0.910 | 0.152 | 123.33±18.02  | 101.33±22.26   | 147.00±58.04  | 0.703 | -      | -     | -      |
| Absolute Eosinophil                       | 223.00±33.00  | 62.33±32.27   | 80.33±17.89   | 0.025   | -       | -       | -      | 103.33±80.98  | 41.67±8.74    | 141.33±76.89  | 0.576  | -      | -     | -     | 274.00±188.00 | 315.33±121.83  | 218.67±32.50  | 0.874 | -      | -     | -      |
| Absolute Basophil                         | 19.50±4.50    | 13.00±7.81    | 16.67±6.23    | 0.776   | -       | -       | -      | 10.00±6.81    | 22.67±4.26    | 18.00±8.14    | 0.441  | -      | -     | -     | 12.33±6.94    | 24.67±3.84     | 12.33±6.33    | 0.301 | -      | -     | -      |
| Percentage reticulocyte                   | 2.90±0.20     | 0.30±0.10     | 1.10±0.10     | 0.002** | 0.002** | 0.006** | 0.056  | 1.15±0.35     | -             | 0.60±0.20     | 0.306  | -      | -     | -     | 3.27±2.12     | 4.20±2.10      | 3.75±0.55     | 0.944 | -      | -     | -      |
| Absolute reticulocyte                     | 260.50±14.50  | 27.50±9.50    | 101.00±11.00  | 0.002** | 0.002** | 0.005** | 0.044* | 106.00±28.00  | -             | 54.50±15.50   | 0.249  | -      | -     | -     | 318.33±204.33 | 3.99±2.03      | 344.50±55.50  | 0.955 | -      | -     | -      |
| Platelet count                            | 1493.0±142.0  | 1058.0±358.0  | 1424.0±212.6  | 0.546   | -       | -       | -      | 1538.5±191.5  | 1698.3±155.8  | 1662.6±221.8  | 0.859  | -      | -     | -     | 992.7±139.8   | 808.33±330.33  | 1107.6±65.7   | 0.622 | -      | -     | -      |

Supplementary table 1: Complete blood count and blood chemistry screen in Shank3-deficient mice.

| Strain                                 | 129          |              |                |         |         |         |        | C57           |               |              |           |        |           |           | FVB            |                |               |        |        |       |        |
|----------------------------------------|--------------|--------------|----------------|---------|---------|---------|--------|---------------|---------------|--------------|-----------|--------|-----------|-----------|----------------|----------------|---------------|--------|--------|-------|--------|
|                                        | WT           | Het          | KO             | ANCOVA  |         |         |        | WT            | Het           | KO           | ANCOVA    |        |           |           | WT             | Het            | KO            | ANCOVA |        |       |        |
| n                                      | 19           | 23           | 12             | p       | WT/Het  | WT/KO   | Het/KO | 17            | 20            | 17           | p         | WT/Het | WT/KO     | Het/KO    | 18             | 19             | 17            | p      | WT/Het | WT/KO | Het/KO |
| Tail flick                             |              |              |                |         |         |         |        |               |               |              |           |        |           |           |                |                |               |        |        |       |        |
| Latency to flick, trial 1 (sec)        | 6.60 ± 0.34  | 7.36±0.66    | 6.42±0.16      | 0.488   | -       | -       | -      | 6.06±0.53     | 6.51±0.42     | 8.31±0.73    | 0.021*    | 0.579  | 0.009**   | 0.028*    | 9.58±0.63      | 9.99±0.30      | 9.64±0.41     | 0.735  | -      | -     | -      |
| Latency to flick, trial 2 (sec)        | 6.50 ± 0.34  | 7.34±0.64    | 7.17±0.43      | 0.499   | -       | -       | -      | 67.21±0.64    | 7.68±0.66     | 6.91±0.45    | 0.709     | -      | -         | -         | 10.04±0.50     | 9.33±0.52      | 10.55±0.34    | 0.180  | -      | -     | -      |
| Latency to flick, trial 3 (sec)        | 7.46 ± 0.42  | 7.06±0.70    | 8.12±0.61      | 0.455   | -       | -       | -      | 7.12±0.59     | 7.51±0.68     | 7.31±0.48    | 0.904     | -      | -         | -         | 9.85±0.46      | 9.03±0.53      | 9.42±0.52     | 0.573  | -      | -     | -      |
| Latency to flick, mean(sec)            | 6.86±0.23    | 7.27±0.60    | 7.24±0.26      | 0.772   | -       | -       | -      | 6.80±0.36     | 7.23±0.39     | 7.53±0.40    | 0.407     | -      | -         | -         | 9.83±0.43      | 9.45±0.32      | 9.87±0.29     | 0.663  | -      | -     | -      |
| Grip strength                          |              |              |                |         |         |         |        |               |               |              |           |        |           |           |                |                |               |        |        |       |        |
| Best (gm)                              | 137.26±3.11  | 140.22±2.54  | 130.58±3.61    | 0.153   | -       | -       | -      | 158.24±4.08   | 147.40±4.41   | 157.61±3.74  | 0.111     | -      | -         | -         | 158.63±3.87    | 148.65±5.22    | 156.33±6.66   | 0.431  | -      | -     | -      |
| Mean (gm)                              | 127.86±2.87  | 128.84±2.13  | 119.72±3.46    | 0.097   | 0.790   | 0.070   | 0.039  | 143.33±3.33   | 135.90±3.35   | 145.67±3.75  | 0.114     | -      | -         | -         | 140.51±3.80    | 138.04±5.03    | 144.69±6.26   | 0.673  | -      | -     | -      |
| Rotarod                                |              |              |                |         |         |         |        |               |               |              |           |        |           |           |                |                |               |        |        |       |        |
| Latency to fall, trial 1 (sec)         | 21.00±2.53   | 16.83±1.58   | 23.42±2.68     | 0.147   | -       | -       | -      | 30.65±2.98    | 35.60±3.60    | 32.94±3.49   | 0.582     | -      | -         | -         | 17.82±1.93     | 17.89±2.22     | 21.44±1.85    | 0.545  | -      | -     | -      |
| Latency to fall, trial 2 (sec)         | 18.58±3.03   | 18.47±1.66   | 23.25±3.17     | 0.275   | -       | -       | -      | 40.47±2.75    | 28.40±3.33    | 44.94±3.60   | 0.368     | -      | -         | -         | 17.59±2.23     | 24.47±2.85     | 21.44±2.35    | 0.158  | -      | -     | -      |
| Latency to fall, trial 3 (sec)         | 15.96±1.25   | 22.39±2.19   | 24.17±4.45     | 0.056   | 0.059   | 0.030   | 0.517  | 40.06±4.40    | 39.05±3.33    | 38.21±4.88   | 0.952     | -      | -         | -         | 21.41±3.39     | 26.47±3.49     | 26.28±2.96    | 0.592  | -      | -     | -      |
| Latency to fall, best trial (sec)      | 25.47±2.97   | 25.22±2.02   | 29.75±3.85     | 0.473   | -       | -       | -      | 47.47±3.18    | 47.85±2.53    | 49.29±3.34   | 0.915     | -      | -         | -         | 24.12±2.97     | 31.47±3.46     | 29.06±2.68    | 0.257  | -      | -     | -      |
| Latency to fall, mean (sec)            | 18.51±1.70   | 19.23±1.42   | 23.61±2.86     | 0.146   | -       | -       | -      | 37.06±2.76    | 37.68±2.24    | 38.70±3.26   | 0.923     | -      | -         | -         | 18.94±2.22     | 22.95±2.32     | 23.06±2.00    | 0.457  | -      | -     | -      |
| Beam walking                           |              |              |                |         |         |         |        |               |               |              |           |        |           |           |                |                |               |        |        |       |        |
| Latency to start (sec)                 | 15.47±3.21   | 17.76±2.83   | 14.24±3.35     | 0.856   | -       | -       | -      | 9.77±2.42     | 6.56±1.55     | 3.19±0.92    | 0.036*    | 0.178  | 0.010**   | 0.176     | 11.48±2.45     | 11.73±2.64     | 14.47±3.09    | 0.501  | -      | -     | -      |
| Distance (cm)                          | 39.46±2.06   | 30.23±2.42   | 40.09±2.58     | 0.006** | 0.004** | 0.927   | 0.020* | 42.92±1.74    | 43.78±1.35    | 43.26±1.60   | 0.893     | -      | -         | -         | 41.14±1.92     | 41.72±1.78     | 39.25±2.05    | 0.664  | -      | -     | -      |
| Crossing time (sec)                    | 24.85±3.18   | 24.51±3.60   | 16.29±2.14     | 0.232   | -       | -       | -      | 15.08±1.83    | 13.08±0.89    | 9.78±0.73    | 0.013*    | 0.234  | 0.003**   | 0.050*    | 18.13±1.50     | 14.93±1.20     | 14.70±1.35    | 0.253  | -      | -     | -      |
| Speed (cm/sec)                         | 3.00±0.22    | 3.80±0.39    | 4.52±0.45      | 0.022** | 0.083   | 0.008** | 0.192  | 4.31±0.25     | 4.90±0.31     | 6.30±0.37    | <0.001*** | 0.345  | <0.001*** | <0.001*** | 3.62±0.26      | 4.76±0.45      | 4.39±0.34     | 0.137  | -      | -     | -      |
| % partial cross (freezing)             | 11.59±3.88   | 22.50±4.70   | 11.11±4.74     | 0.072   | 0.073   | 0.563   | 0.048  | 7.58±3.28     | 2.53±1.78     | 1.47±1.47    | 0.142     | -      | -         | -         | 9.86±3.56      | 5.63±2.76      | 7.35±3.19     | 0.661  | -      | -     | -      |
| % falls                                | 23.19±5.12   | 41.25±5.54   | 20.00±6.03     | 0.037*  | 0.015*  | 0.805   | 0.103  | 9.09±3.57     | 12.50±3.72    | 10.29±3.71   | 0.825     | -      | -         | -         | 18.31±4.62     | 14.08±4.16     | 22.06±5.07    | 0.503  | -      | -     | -      |
| % of false starts                      | 4.35±2.47    | 1.25±1.25    | 4.44±3.11      | 0.516   | -       | -       | -      | 3.03±2.13     | 3.75±2.14     | 1.14±1.47    | 0.756     | -      | -         | -         | 2.82±1.98      | 0.00±0.00      | 1.47±1.47     | 0.403  | -      | -     | -      |
| Number of slips                        | 2.64±0.26    | 2.20±0.19    | 2.67±0.27      | 0.331   | -       | -       | -      | 2.56±0.36     | 2.46±0.20     | 2.63±0.19    | 0.899     | -      | -         | -         | 0.69±0.10      | 0.75±0.09      | 0.93±0.12     | 0.165  | -      | -     | -      |
| Open field locomotion                  |              |              |                |         |         |         |        |               |               |              |           |        |           |           |                |                |               |        |        |       |        |
| Moving distance 1hr (cm)               | 3995.6±341.3 | 4357.7±248.5 | 5171.83±385.27 | 0.127   | -       | -       | -      | 7373.1±468.92 | 7242.2±567.8  | 6870.4±673.4 | 0.827     | -      | -         | -         | 12446.9±1007.6 | 12837.0±747.3  | 13394.5±533.7 | 0.633  | -      | -     | -      |
| Moving distance time x genotype effect | -            | -            | -              | 0.009** | 0.367   | 0.043*  | 0.181  | -             | -             | -            | 0.845     | -      | -         | -         | -              | -              | -             | 0.290  | -      | -     | -      |
| Moving distance 0-10 min (cm)          | 1279.7±109.0 | 1627.9±80.7  | 1694.9±80.7    | 0.014*  | 0.011*  | 0.015*  | 0.739  | 2026.5±146.4  | 1976.5±179.0  | 1874.6±187.1 | 0.831     | -      | -         | -         | 2974.7±155.9   | 3154.6±151.4   | 3281.5±168.7  | 0.317  | -      | -     | -      |
| Moving distance 10-20 min (cm)         | 657.11±71.17 | 764.09±51.85 | 764.09±51.82   | 0.158   | -       | -       | -      | 1182.8±87.8   | 1143.9±97.6   | 1080.8±121.5 | 0.792     | -      | -         | -         | 2106.1±148.1   | 2213.6±135.0   | 2281.8±120.7  | 0.544  | -      | -     | -      |
| Moving distance 20-30 min (cm)         | 715.33±88.94 | 694.77±58.14 | 697.77±58.14   | 0.773   | -       | -       | -      | 1175.0±86.3   | 1061.8±72.8   | 1056.6±109.2 | 0.555     | -      | -         | -         | 1887.1±174.4   | 2057.2±131.5   | 2139.3±93.4   | 0.313  | -      | -     | -      |
| Moving distance 30-40 min (cm)         | 563.83±64.23 | 477.23±51.75 | 477.23±51.75   | 0.150   | -       | -       | -      | 1120.6±76.0   | 1110.2±110.7  | 1007.3±108.3 | 0.693     | -      | -         | -         | 1889.28±157.90 | 1956.32±131.50 | 2028.5±105.6  | 0.689  | -      | -     | -      |
| Moving distance 40-50 min 5 (cm)       | 458.06±51.21 | 436.77±66.77 | 436.77±66.77   | 0.475   | -       | -       | -      | 1000.2±84.7   | 989.21±76.12  | 1032.9±118.0 | 0.946     | -      | -         | -         | 1815.3±194.9   | 1735.7±133.4   | 1886.4±83.5   | 0.774  | -      | -     | -      |
| Moving distance 50-60 min (cm)         | 321.5±54.32  | 356.95±42.56 | 356.95±42.56   | 0.213   | -       | -       | -      | 867.94±81.94  | 960.53±102.27 | 818.25±92.31 | 0.557     | -      | -         | -         | 1774.4±234.3   | 1719.9±120.4   | 1776.8±95.5   | 0.964  | -      | -     | -      |
| Moving time 1hr (sec)                  | 509.81±41.37 | 553.32±31.79 | 638.63±34.94   | 0.129   | -       | -       | -      | 746.64±38.26  | 758.14±43.46  | 720.41±54.71 | 0.835     | -      | -         | -         | 1014.0±61.9    | 1034.4±45.0    | 1058.9±38.6   | 0.813  | -      | -     | -      |
| Moving time time x genotype effect     | -            | -            | -              | 0.017*  | 0.737   | 0.044*  | 0.180  | -             | -             | -            | 0.450     | -      | -         | -         | -              | -              | -             | 0.225  | -      | -     | -      |
| Moving time 0-10 min (sec)             | 155.36±12.34 | 194.32±8.45  | 198.32±8.95    | 0.008** | 0.007** | 0.009** | 0.678  | 190.57±8.29   | 192.22±10.86  | 176.51±12.87 | 0.546     | -      | -         | -         | 222.63±7.78    | 230.67±7.91    | 240.94±10.28  | 0.304  | -      | -     | -      |
| Moving time 10-20 min (sec)            | 82.48±8.92   | 96.95±6.39   | 110.95±9.28    | 0.127   | -       | -       | -      | 121.82±8.24   | 124.34±7.50   | 115.21±8.93  | 0.749     | -      | -         | -         | 173.38±8.66    | 177.82±8.59    | 184.31±7.60   | 0.638  | -      | -     | -      |
| Moving time 20-30 min (sec)            | 90.60±10.18  | 91.34±7.71   | 103.83±8.42    | 0.828   | -       | -       | -      | 119.07±6.70   | 113.47±6.43   | 114.97±9.62  | 0.840     | -      | -         | -         | 155.46±11.22   | 170.50±9.39    | 171.52±6.21   | 0.298  | -      | -     | -      |
| Moving time 30-40 min (sec)            | 75.34±8.39   | 64.34±7.71   | 84.28±6.94     | 0.287   | -       | -       | -      | 116.79±7.10   | 115.71±9.17   | 110.30±8.71  | 0.848     | -      | -         | -         | 158.54±10.27   | 162.28±8.38    | 161.90±7.93   | 0.936  | -      | -     | -      |
| Moving time 40-50 min (sec)            | 61.84±6.73   | 47.15±8.47   | 73.53±8.21     | 0.393   | -       | -       | -      | 107.21±8.21   | 107.39±7.15   | 112.33±10.47 | 0.901     | -      | -         | -         | 153.67±14.92   | 145.48±9.29    | 152.25±7.48   | 0.788  | -      | -     | -      |
| Moving time 50-60 min (sec)            | 44.18±7.26   | 48.59±5.77   | 67.73±12.05    | 0.212   | -       | -       | -      | 91.18±8.21    | 105.00±9.58   | 91.09±7.50   | 0.414     | -      | -         | -         | 150.32±14.89   | 147.69±8.03    | 147.96±8.91   | 0.978  | -      | -     | -      |

Supplementary table 2: Sensory-motor performances in *Shank3*-deficient mice.

| Strain                                 | 129           |              |               |        |        |        |         | C57          |              |              |         |        |          |         | FVB          |              |              |         |        |          |         |
|----------------------------------------|---------------|--------------|---------------|--------|--------|--------|---------|--------------|--------------|--------------|---------|--------|----------|---------|--------------|--------------|--------------|---------|--------|----------|---------|
| Genotype                               | WT            | Het          | KO            | ANCOVA |        |        |         | WT           | Het          | KO           | ANCOVA  |        |          |         | WT           | Het          | KO           | ANCOVA  |        |          |         |
| n                                      | 19            | 23           | 12            | p      | WT/Het | WT/KO  | Het/KO  | 17           | 20           | 17           | p       | WT/Het | WT/KO    | Het/KO  | 18           | 19           | 17           | p       | WT/Het | WT/KO    | Het/KO  |
| Open field thymotaxis                  |               |              |               |        |        |        |         |              |              |              |         |        |          |         |              |              |              |         |        |          |         |
| Center distance 1hr (cm)               | 1301.9±169.4  | 1084.0±136.8 | 1276.8±213.2  | 0.564  | -      | -      | -       | 2554.6±295.5 | 2044.2±185.5 | 1759.7±216.1 | 0.060   | 0.125  | 0.020    | 0.354   | 4390.1±322.7 | 4919.4±354.2 | 4764.6±307.5 | 0.582   | -      | -        | -       |
| Center distance time x genotype effect | -             | -            | -             | 0.522  | -      | -      | -       | -            | -            | -            | 0.858   | -      | -        | -       | -            | -            | -            | 0.199   | -      | -        | -       |
| Center time 1hr (sec)                  | 678.29±118.15 | 389.15±46.58 | 667.59±122.21 | 0.047* | 0.024* | 0.923  | 0.068   | 836.91±83.45 | 832.46±87.04 | 719.93±90.36 | 0.552   | -      | -        | -       | 669.05±51.59 | 689.89±39.93 | 670.88±48.30 | 0.949   | -      | -        | -       |
| Center time time x genotype effect     | -             | -            | -             | 0.063  | -      | -      | -       | -            | -            | -            | 0.006** | 1.000  | 0.349    | 0.337   | -            | -            | -            | 0.110   | -      | -        | -       |
| Number of center entries 1hr           | 122.89±14.55  | 101.91±11.27 | 122.75±19.38  | 0.516  | -      | -      | -       | 240.47±23.86 | 196.16±17.20 | 176.94±21.65 | 0.099   | 0.136  | 0.037    | 0.480   | 362.89±23.26 | 414.47±23.52 | 384.06±24.28 | 0.345   | -      | -        | -       |
| Center entries time x genotype effect  | -             | -            | -             | 0.615  | -      | -      | -       | -            | -            | -            | 0.773   | -      | -        | -       | -            | -            | -            | 0.484   | -      | -        | -       |
| Center rest 1hr (sec)                  | 518.22±100.51 | 262.86±33.10 | 528.92±113.45 | 0.036* | 0.020* | 0.999  | 0.049*  | 590.26±67.81 | 618.49±74.81 | 531.30±78.05 | 0.676   | -      | -        | -       | 365.02±36.11 | 356.12±30.33 | 350.98±34.02 | 0.944   | -      | -        | -       |
| Center rest time x genotype effect     | -             | -            | -             | 0.060  | -      | -      | -       | -            | -            | -            | 0.006** | 0.757  | 0.557    | 0.382   | -            | -            | -            | 0.149   | -      | -        | -       |
| Center rest 0-10 min (sec)             | 63.86±17.32   | 51.86±11.33  | 88.32±36.04   | 0.843  | -      | -      | -       | 41.50±5.90   | 80.71±13.84  | 73.77±12.92  | 0.050*  | 0.021* | 0.063    | 0.690   | 30.86±3.29   | 33.34±4.34   | 27.71±3.63   | 0.602   | -      | -        | -       |
| Center rest 10-20 min (sec)            | 76.69±17.98   | 46.85±12.42  | 58.53±20.37   | 0.394  | -      | -      | -       | 82.65±12.81  | 92.28±13.18  | 81.26±11.88  | 0.793   | -      | -        | -       | 51.66±5.76   | 65.15±6.12   | 52.71±3.63   | 0.275   | -      | -        | -       |
| Center rest 20-30 min (sec)            | 106.24±22.06  | 45.42±9.19   | 70.46±22.71   | 0.033* | 0.012* | 0.085  | 0.690   | 102.14±16.57 | 83.37±13.45  | 86.68±16.70  | 0.668   | -      | -        | -       | 62.96±9.05   | 63.36±7.09   | 70.48±9.71   | 0.774   | -      | -        | -       |
| Center rest 30-40 min (sec)            | 78.84±20.40   | 37.45±9.19   | 83.98±22.26   | 0.071  | 0.059  | 0.711  | 0.050   | 127.55±13.94 | 104.83±19.30 | 101.28±18.57 | 0.510   | -      | -        | -       | 69.20±8.55   | 60.80±7.27   | 62.09±7.40   | 0.648   | -      | -        | -       |
| Center rest 40-50 min (sec)            | 90.16±22.59   | 35.88±9.35   | 98.58±25.64   | 0.019* | 0.025* | 0.544  | 0.013*  | 119.72±18.80 | 118.81±16.22 | 111.86±22.02 | 0.954   | -      | -        | -       | 65.52±8.25   | 61.42±7.98   | 68.88±8.39   | 0.818   | -      | -        | -       |
| Center rest 50-60 min (sec)            | 102.44±23.80  | 45.40±9.83   | 129.05±32.85  | 0.020* | 0.042* | 0.367  | 0.010** | 116.71±19.98 | 140.49±18.74 | 76.46±16.74  | 0.039   | 0.319  | 0.119    | 0.012   | 84.83±11.00  | 72.77±6.38   | 69.82±8.01   | 0.368   | -      | -        | -       |
| Open field vertical activity           |               |              |               |        |        |        |         |              |              |              |         |        |          |         |              |              |              |         |        |          |         |
| Number of rears 1hr                    | 52.17±12.69   | 52.00±9.61   | 43.92±12.70   | 0.971  | -      | -      | -       | 414.47±22.23 | 396.05±15.62 | 337.00±23.78 | 0.049*  | 0.568  | 0.021*   | 0.065   | 696.11±20.55 | 709.79±20.52 | 776.24±30.87 | 0.050*  | 0.654  | 0.025*   | 0.058   |
| Number of rears time x genotype effect | -             | -            | -             | 0.849  | -      | -      | -       | -            | -            | -            | 0.207   | -      | -        | -       | -            | -            | -            | 0.702   | -      | -        | -       |
| Elevated zero maze                     |               |              |               |        |        |        |         |              |              |              |         |        |          |         |              |              |              |         |        |          |         |
| Total moving time (sec)                | 78.58±5.76    | 88.00±4.44   | 78.85±4.81    | 0.415  | -      | -      | -       | 93.90±4.60   | 103.03±5.79  | 121.04±8.46  | 0.018*  | 0.439  | 0.006**  | 0.030*  | 113.25±7.01  | 129.40±6.87  | 153.86±7.98  | 0.002** | 0.344  | 0.001*** | 0.009** |
| Total distance (cm)                    | 1636.7±116.6  | 1884.6±101.8 | 1818.2±113.3  | 0.333  | -      | -      | -       | 1404.7±75.4  | 1537.6±83.7  | 1977.0±182.8 | 0.002** | 0.532  | 0.001*** | 0.003** | 1864.4±182.1 | 2250.2±157.7 | 2807.7±196.1 | 0.003** | 0.372  | 0.001*** | 0.010** |
| Time in open arm (sec)                 | 113.99±8.41   | 110.64±4.40  | 100.95±7.77   | 0.612  | -      | -      | -       | 72.85±5.74   | 88.76±5.76   | 95.93±6.74   | 0.027*  | 0.079  | 0.008**  | 0.262   | 120.13±6.14  | 131.97±4.54  | 153.12±8.09  | 0.007** | 0.204  | 0.002**  | 0.040*  |
| Time in closed arm (sec)               | 186.01±8.41   | 189.36±4.40  | 199.05±7.77   | 0.612  | -      | -      | -       | 227.15±5.74  | 211.24±5.76  | 204.07±6.74  | 0.027*  | 0.079  | 0.008**  | 0.262   | 179.87±6.14  | 168.03±4.54  | 146.89±8.09  | 0.007** | 0.204  | 0.002**  | 0.040*  |
| Ratio Open/close                       | 0.72±0.09     | 0.63±0.04    | 0.56±0.08     | 0.427  | -      | -      | -       | 0.34±0.04    | 0.46±0.04    | 0.53±0.06    | 0.018*  | 0.096  | 0.005**  | 0.157   | 0.75±0.07    | 0.86±0.05    | 1.20±0.12    | 0.002** | 0.355  | 0.001*** | 0.008** |
| Latency to enter open arm (sec)        | 13.66±3.78    | 12.16±1.89   | 9.07±3.21     | 0.698  | -      | -      | -       | 23.09±5.69   | 17.41±3.31   | 14.05±3.84   | 0.303   | -      | -        | -       | 18.18±5.16   | 8.21±1.25    | 7.80±1.42    | 0.065   | 0.043  | 0.040    | 0.928   |
| Number of entries in open arm          | 26.37±1.57    | 29.98±1.31   | 32.00±2.01    | 0.050* | 0.081  | 0.023* | 0.416   | 21.88±1.27   | 23.75±1.35   | 28.50±2.27   | 0.008** | 0.532  | 0.004**  | 0.012*  | 32.44±2.36   | 35.55±1.73   | 40.21±2.07   | 0.083   | 0.671  | 0.037    | 0.080   |

Supplementary table 3: Anxiety-like behavior in *Shank3*-deficient mice.

| Strain                                                                                     | 129          |              |              |                        |        |           |          | C57         |             |              |                        |           |           |           | FVB          |              |              |                        |           |           |           |
|--------------------------------------------------------------------------------------------|--------------|--------------|--------------|------------------------|--------|-----------|----------|-------------|-------------|--------------|------------------------|-----------|-----------|-----------|--------------|--------------|--------------|------------------------|-----------|-----------|-----------|
| Genotype                                                                                   | WT           | Het          | KO           | T-test, p-value        |        |           |          | WT          | Het         | KO           | T-test, p-value        |           |           |           | WT           | Het          | KO           | T-test, p-value        |           |           |           |
| n                                                                                          | 19           | 23           | 12           | Test                   | WT     | Het       | KO       | 17          | 20          | 17           | Test                   | WT        | Het       | KO        | 18           | 19           | 17           | Test                   | WT        | Het       | KO        |
| 3 chambered social interaction test - sociability                                          |              |              |              |                        |        |           |          |             |             |              |                        |           |           |           |              |              |              |                        |           |           |           |
| time exploring mouse (sec)                                                                 | 210.53±26.22 | 200.61±15.98 | 219.08±17.48 | mouse vs object        | 0.028* | <0.001*** | 0.001*** | 139.65±8.62 | 134.10±7.86 | 165.35±12.27 | mouse vs object        | 0.003**   | 0.007**   | <0.001*** | 220.72±13.26 | 214.10±10.55 | 276.23±22.54 | mouse vs object        | <0.001*** | <0.001*** | <0.001*** |
| time exploring object (sec)                                                                | 103.10±21.65 | 84.78±15.426 | 121.00±11.40 |                        |        |           |          | 91.29±7.74  | 98.75±6.65  | 85.85±5.60   |                        |           |           |           | 8.983±8.77   | 87.37±6.89   | 81.59±12.44  |                        |           |           |           |
| 3 chambered social interaction test - preference for social novelty and social recognition |              |              |              |                        |        |           |          |             |             |              |                        |           |           |           |              |              |              |                        |           |           |           |
| time exploring familiar mouse (sec)                                                        | 121.00±25.20 | 102.26±13.83 | 103.75±21.57 | familiar vs unfamiliar | 0.210  | 0.130     | 0.071    | 73.00±6.46  | 67.85±6.27  | 79.41±7.51   | familiar vs unfamiliar | <0.001*** | <0.001*** | <0.001*** | 107.22±10.78 | 99.89±8.02   | 104.88±12.79 | familiar vs unfamiliar | 0.001***  | 0.001***  | 0.001***  |
| time exploring unfamiliar mouse (sec)                                                      | 179.21±25.74 | 145.35±18.95 | 184.83±26.10 |                        |        |           |          | 127.18±9.67 | 132.70±8.86 | 156.06±12.11 |                        |           |           |           | 167.39±10.42 | 168.95±13.55 | 232.00±22.87 |                        |           |           |           |

| Strain                    | 129       |           |           |        |        |       |        | C57       |           |           |        |        |       |        | FVB       |           |           |        |        |       |        |
|---------------------------|-----------|-----------|-----------|--------|--------|-------|--------|-----------|-----------|-----------|--------|--------|-------|--------|-----------|-----------|-----------|--------|--------|-------|--------|
| Genotype                  | WT        | Het       | KO        | ANCOVA |        |       |        | WT        | Het       | KO        | ANCOVA |        |       |        | WT        | Het       | KO        | ANCOVA |        |       |        |
| n                         | 19        | 23        | 12        | p      | WT/Het | WT/KO | Het/KO | 17        | 20        | 17        | p      | WT/Het | WT/KO | Het/KO | 18        | 19        | 17        | p      | WT/Het | WT/KO | Het/KO |
| Nest building             |           |           |           |        |        |       |        |           |           |           |        |        |       |        |           |           |           |        |        |       |        |
| Nest building, mean score | 2.26±0.10 | 2.48±0.12 | 2.42±0.19 | 0.417  | -      | -     | -      | 2.23±0.25 | 2.55±0.21 | 2.18±0.27 | 0.519  | -      | -     | -      | 1.89±0.16 | 1.59±0.14 | 1.76±0.16 | 0.266  | -      | -     | -      |

Supplementary table 4: Social behavior in *Shank3*-deficient mice

| Strain                                          | 129         |            |              |           |         |           |          | C57        |            |            |        |        |       |        | FVB        |            |            |         |         |         |        |
|-------------------------------------------------|-------------|------------|--------------|-----------|---------|-----------|----------|------------|------------|------------|--------|--------|-------|--------|------------|------------|------------|---------|---------|---------|--------|
|                                                 | WT          | Het        | KO           | ANCOVA    |         |           |          | WT         | Het        | KO         | ANCOVA |        |       |        | WT         | Het        | KO         | ANCOVA  |         |         |        |
| n                                               | 19/14*      | 23/19*     | 12/9*        | p         | WT/Het  | WT/KO     | Het/KO   | 17/16*     | 20/20*     | 17/14*     | p      | WT/Het | WT/KO | Het/KO | 18/12*     | 19/14*     | 17/12*     | p       | WT/Het  | WT/KO   | Het/KO |
| <b>Fear conditioning</b>                        |             |            |              |           |         |           |          |            |            |            |        |        |       |        |            |            |            |         |         |         |        |
| Day1, pre-shock, 0 to 120 sec (% freezing)      | 0.31±0.14   | 0.18±0.08  | 0.17±0.09    | 0.589     | -       | -         | -        | 0.21±0.11  | 0.07±0.05  | 0.18±0.18  | 0.664  | -      | -     | -      | 0.00±0.00  | 0.00±0.00  | 0.00±0.00  | -       | -       | -       | -      |
| Day1, tone 1, 120 to 140 sec (% freezing)       | 0.98±0.68   | 0.23±0.23  | 0.00±0.00    | 0.321     | -       | -         | -        | 1.26±0.69  | 0.47±0.22  | 0.00±0.00  | 0.109  | -      | -     | -      | 0.07±0.07  | 0.28±0.19  | 0.31±0.21  | 0.753   | -       | -       | -      |
| Day1, post-shock 1, 140 to 260 (% freezing)     | 8.50±1.76   | 2.85±0.85  | 2.03±0.82    | 0.002**   | 0.002** | 0.002**   | 0.583    | 5.25±1.37  | 3.49±0.96  | 2.83±0.90  | 0.295  | -      | -     | -      | 0.03±0.03  | 0.09±0.05  | 0.05±0.04  | 0.556   | -       | -       | -      |
| Day1, tone 2, 260 to 280 (% freezing)           | 11.74±2.98  | 11.69±3.23 | 5.18±2.19    | 0.361     | -       | -         | -        | 7.71±2.16  | 3.58±1.61  | 4.85±1.78  | 0.284  | -      | -     | -      | 0.00±0.00  | 0.00±0.00  | 0.00±0.00  | -       | -       | -       | -      |
| Day1, post-shock 2, 280 to 400 sec (% freezing) | 45.33±3.61  | 28.93±3.92 | 15.39±4.78   | <0.001*** | 0.003** | <0.001*** | 0.065    | 18.18±2.93 | 14.12±3.09 | 13.94±2.98 | 0.552  | -      | -     | -      | 0.15±0.08  | 0.20±0.09  | 0.00±0.00  | 0.093   | 0.675   | 0.103   | 0.037  |
| Day1, tone 3, 400 to 420 sec (% freezing)       | 56.33±3.61  | 43.90±5.42 | 18.74±6.37   | 0.002**   | 0.086   | <0.001*** | 0.020*   | 23.23±4.18 | 19.93±3.12 | 21.98±4.61 | 0.830  | -      | -     | -      | 0.30±0.23  | 0.21±0.16  | 0.31±0.24  | 0.909   | -       | -       | -      |
| Day1, post-shock 3, 420 to 540 sec (% freezing) | 46.88±4.66  | 33.81±4.28 | 14.24±2.95   | <0.001*** | 0.031*  | <0.001*** | 0.001*** | 20.97±2.89 | 12.00±2.59 | 18.98±2.62 | 0.052  | 0.022  | 0.598 | 0.075  | 0.58±0.27  | 0.42±0.23  | 0.10±0.10  | 0.163   | -       | -       | -      |
| Day2, 0 to 60 sec (% freezing)                  | 13.20±2.97  | 11.31±2.66 | 14.19±2.97   | 0.748     | -       | -         | -        | 8.48±2.53  | 6.29±1.50  | 8.55±2.64  | 0.701  | -      | -     | -      | 0.60±0.36  | 0.52±0.36  | 0.18±0.13  | 0.586   | -       | -       | -      |
| Day2, 60 to 120 sec (% freezing)                | 28.01±3.82  | 26.97±3.27 | 27.44±4.06   | 0.978     | -       | -         | -        | 15.30±3.05 | 13.60±3.11 | 15.99±3.30 | 0.868  | -      | -     | -      | 1.08±0.56  | 0.86±0.42  | 0.11±0.11  | 0.273   | -       | -       | -      |
| Day2, 120 to 180 sec (% freezing)               | 40.08±4.49  | 36.71±4.29 | 30.94±3.99   | 0.503     | -       | -         | -        | 21.42±3.52 | 17.92±3.41 | 18.14±4.31 | 0.766  | -      | -     | -      | 1.11±0.66  | 0.87±0.67  | 0.00±0.00  | 0.425   | -       | -       | -      |
| Day2, 180 to 240 sec (% freezing)               | 42.05±4.40  | 42.67±4.76 | 32.85±4.15   | 0.298     | -       | -         | -        | 20.57±4.42 | 19.42±3.62 | 24.49±4.09 | 0.668  | -      | -     | -      | 1.44±0.79  | 0.97±0.55  | 0.21±0.14  | 0.385   | -       | -       | -      |
| Day2, total (% freezing)                        | 30.84±2.94  | 29.41±2.90 | 105.42±10.51 | 0.634     | -       | -         | -        | 16.94±2.82 | 14.30±2.58 | 16.79±3.29 | 0.810  | -      | -     | -      | 1.05±0.40  | 0.80±0.46  | 0.12±0.05  | 0.234   | -       | -       | -      |
| Day3, pre-tone, 0 to 60 sec (% freezing)        | 2.94±0.90   | 3.79±1.60  | 6.94±2.36    | 0.322     | -       | -         | -        | 4.76±2.12  | 5.68±2.00  | 6.92±3.07  | 0.833  | -      | -     | -      | 0.10±0.10  | 0.31±0.19  | 0.16±0.16  | 0.491   | -       | -       | -      |
| Day3, pre-tone 60 to 120 sec (% freezing)       | 17.12±3.86  | 12.49±2.82 | 15.36±4.24   | 0.487     | -       | -         | -        | 11.48±3.33 | 10.75±2.15 | 11.62±3.16 | 0.980  | -      | -     | -      | 0.50±0.42  | 0.35±0.21  | 0.16±0.11  | 0.783   | -       | -       | -      |
| Day3, tone 1, 120 to 140 sec (% freezing)       | 65.30±4.07  | 53.43±3.67 | 59.52±5.59   | 0.116     | -       | -         | -        | 53.54±5.84 | 61.51±4.07 | 49.86±5.59 | 0.267  | -      | -     | -      | 18.63±3.76 | 13.69±3.53 | 12.51±3.61 | 0.555   | -       | -       | -      |
| Day3, post-tone 1, 140 to 200 sec (% freezing)  | 64.28±4.45  | 53.72±3.72 | 65.26±5.31   | 0.089     | 0.067   | 0.767     | 0.065    | 38.02±6.09 | 41.82±5.32 | 43.01±5.22 | 0.815  | -      | -     | -      | 6.27±1.35  | 1.98±0.70  | 1.71±0.62  | 0.004** | 0.004** | 0.004** | 0.884  |
| Day3, post-tone 1, 200 to 260 (% freezing)      | 57.30±5.75  | 50.62±4.76 | 58.76±3.56   | 0.436     | -       | -         | -        | 28.14±6.07 | 27.72±3.34 | 28.91±6.15 | 0.873  | -      | -     | -      | 0.70±0.53  | 0.84±0.70  | 0.31±0.18  | 0.793   | -       | -       | -      |
| Day3, post-tone 1, 260 to 290 sec (% freezing)  | 55.30±5.31  | 43.50±6.06 | 52.90±6.77   | 0.238     | -       | -         | -        | 28.89±6.20 | 24.08±5.45 | 28.33±5.91 | 0.820  | -      | -     | -      | 0.84±0.66  | 1.78±0.90  | 1.00±0.70  | 0.588   | -       | -       | -      |
| Day3, tone 2, 290 to 310 sec (% freezing)       | 78.61±3.80  | 73.12±4.67 | 65.37±7.99   | 0.224     | -       | -         | -        | 68.61±5.81 | 61.71±3.67 | 54.54±4.00 | 0.116  | -      | -     | -      | 26.05±4.77 | 17.81±3.57 | 20.11±4.39 | 0.234   | -       | -       | -      |
| Day3, post-tone 2, 310 to 333 sec (% freezing)  | 789.30±5.25 | 78.44±3.65 | 82.09±5.09   | 0.898     | -       | -         | -        | 53.10±7.13 | 53.99±5.96 | 50.08±5.84 | 0.904  | -      | -     | -      | 7.06±2.58  | 6.05±2.39  | 1.99±1.35  | 0.291   | -       | -       | -      |
| <b>Y-maze spontaneous alternation test</b>      |             |            |              |           |         |           |          |            |            |            |        |        |       |        |            |            |            |         |         |         |        |
| Total number of choices                         | 10.79±1.30  | 11.91±0.91 | 9.75±0.82    | 0.585     | -       | -         | -        | 13.53±1.35 | 15.10±0.96 | 15.18±1.65 | 0.619  | -      | -     | -      | 11.17±2.08 | 15.47±2.64 | 14.06±2.76 | 0.696   | -       | -       | -      |
| Number of correct choice                        | 6.16±0.73   | 6.65±0.68  | 5.08±0.89    | 0.516     | -       | -         | -        | 8.88±0.77  | 9.70±0.73  | 10.71±1.08 | 0.364  | -      | -     | -      | 7.00±1.36  | 8.11±1.54  | 8.35±1.69  | 0.978   | -       | -       | -      |
| Correct/total, animals with at least 10 choices | 0.58±0.04   | 0.56±0.05  | 0.55±0.06    | 0.927     | -       | -         | -        | 0.68±0.04  | 0.65±0.03  | 0.71±0.03  | 0.560  | -      | -     | -      | 0.60±0.04  | 0.50±0.05  | 0.60±0.04  | 0.176   | -       | -       | -      |

\* X/Y, X=total number of mice tested, Y=number of animals that made at least 10 choices

Supplementary table 5: Learning and memory in Shank3-deficient mice

| Strain                                          | 129          |              |              |        |        |       |        | C57          |              |              |        |        |       |        | FVB          |              |              |        |        |       |        |
|-------------------------------------------------|--------------|--------------|--------------|--------|--------|-------|--------|--------------|--------------|--------------|--------|--------|-------|--------|--------------|--------------|--------------|--------|--------|-------|--------|
| Genotype                                        | WT           | Het          | KO           | ANCOVA |        |       |        | WT           | Het          | KO           | ANCOVA |        |       |        | WT           | Het          | KO           | ANCOVA |        |       |        |
| n                                               | 19           | 23           | 12           | p      | WT/Het | WT/KO | Het/KO | 17           | 20           | 17           | p      | WT/Het | WT/KO | Het/KO | 18           | 19           | 17           | p      | WT/Het | WT/KO | Het/KO |
| Revolutions                                     |              |              |              |        |        |       |        |              |              |              |        |        |       |        |              |              |              |        |        |       |        |
| total number of revolution, 1hr                 | 26.39±2.58   | 29.14±2.18   | 37.17±3.50   | 0.091  | 0.401  | 0.030 | 0.121  | 49.76±3.12   | 50.42±3.78   | 47.75±4.63   | 0.892  | -      | -     | -      | 79.89±6.15   | 84.75±5.92   | 86.71±3.04   | 0.547  | -      | -     | -      |
| Revolutions time x genotype effect              | -            | -            | -            | 0.518  | -      | -     | -      | -            | -            | -            | 0.574  | -      | -     | -      | -            | -            | -            | -      | -      | -     | -      |
| Clockwise revolution, 1hr (%)                   | 48.16±3.47   | 48.36±4.15   | 56.17±7.02   | 0.631  | -      | -     | -      | 53.88±2.84   | 54.82±3.72   | 55.46±3.56   | 0.950  | -      | -     | -      | 54.36±2.58   | 51.80±2.70   | 57.40±3.05   | 0.384  | -      | -     | -      |
| Revolutions time x genotype effect              | -            | -            | -            | 0.074  | 0.410  | 0.036 | 0.139  | -            | -            | -            | 0.629  | -      | -     | -      | -            | -            | -            | 0.142  | -      | -     | -      |
| Perseverance                                    |              |              |              |        |        |       |        |              |              |              |        |        |       |        |              |              |              |        |        |       |        |
| Perseveration, animals with at least 10 choices | 1.21±0.26    | 1.26±0.23    | 1.00±0.24    | 0.907  | -      | -     | -      | 0.690.22     | 1.100.25     | 0.860.29     | 0.549  | -      | -     | -      | 1.07±0.35    | 2.36±0.41    | 1.33±0.39    | 0.104  | -      | -     | -      |
| Grooming                                        |              |              |              |        |        |       |        |              |              |              |        |        |       |        |              |              |              |        |        |       |        |
| Latency to first grooming bout (sec)            | 383.32±36.84 | 336.39±25.24 | 359.39±25.24 | 0.517  | -      | -     | -      | 171.35±23.60 | 199.20±25.26 | 166.76±18.37 | 0.552  | -      | -     | -      | 246.61±24.27 | 249.00±25.59 | 251.76±35.20 | 0.939  | -      | -     | -      |
| Total number of bouts                           | 1.53±0.27    | 1.83±0.18    | 2.00±0.43    | 0.579  | -      | -     | -      | 3.24±0.42    | 3.65±0.56    | 2.82±0.27    | 0.418  | -      | -     | -      | 2.22±0.32    | 2.00±0.22    | 2.47±0.32    | 0.506  | -      | -     | -      |
| Total time of grooming (sec)                    | 10.84±1.83   | 13.57±1.73   | 15.17±2.44   | 0.326  | -      | -     | -      | 18.71±3.95   | 21.20±2.41   | 22.47±4.77   | 0.780  | -      | -     | -      | 11.78±1.86   | 10.16±1.54   | 11.41±1.55   | 0.785  | -      | -     | -      |
| Barbering                                       |              |              |              |        |        |       |        |              |              |              |        |        |       |        |              |              |              |        |        |       |        |
| n                                               | 29           | 30           | 18           | p      | WT/Het | WT/KO | Het/KO | 31           | 41           | 35           | p      | WT/Het | WT/KO | Het/KO | 35           | 35           | 35           | p      | WT/Het | WT/KO | Het/KO |
| Percentage of mice with barbering               | 58.62±9.31   | 63.33±8.95   | 83.33±9.04   | 0.206  | -      | -     | -      | 0.00±0.00    | 2.44±2.44    | 2.86±2.86    | 0.661  | -      | -     | -      | 0.00±0.00    | 0.00±0.00    | 0.00±0.00    | -      | -      | -     | -      |

Supplementary table 6: Stereotypies, repetitive behavior and perseverance in Shank3-deficient mice.
